# Supplementary material for: Novel Parallelized Electroporation by Electrostatic Manipulation of a Water-in-Oil Droplet as a Microreactor
Source: PubMed Central journal article supplement (PMC4674099; doi:10.1371/journal.pone.0144254), 2015-12-09
Supplement: pone.0144254.s002.pdf [file pone.0144254.s002.pdf]

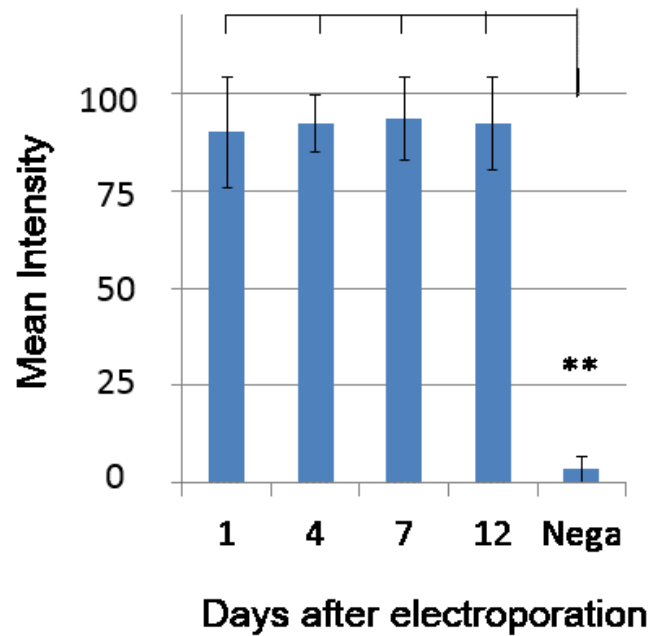

**S2 Fig. The mean intensity of HEK cells 1, 4, 7, and 12 days after W/O droplet electroporation and negative controls.** The mean intensity of HEK cells 1, 4, 7, and 12 days after W/O droplet electroporation at 1.8 kV for 5 minutes and of negative controls. Mean intensity was plotted against number of days after W/O droplet electroporation. Data are means  $\pm$  standard deviation (s.d.) of more than 10 cells counted from at least four different fields on fluorescence microscopy images (\*\* $P < 0.0001$ ; unpaired, two-tailed Student's  $t$  test).
