# Supplementary material for: Novel Parallelized Electroporation by Electrostatic Manipulation of a Water-in-Oil Droplet as a Microreactor
Source: PubMed Central journal article supplement (PMC4674099; doi:10.1371/journal.pone.0144254), 2015-12-09

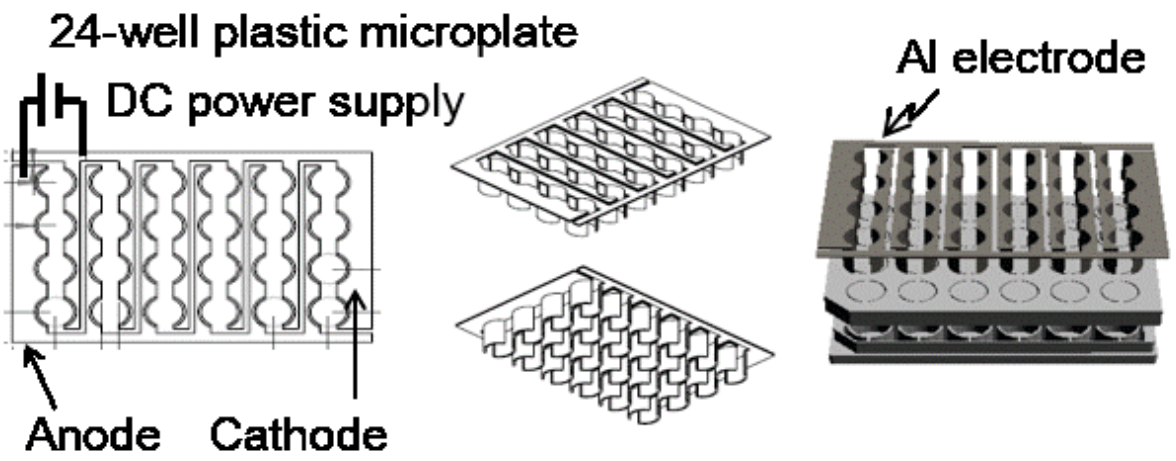

Supplement: pone.0144254.s004.pdf [file pone.0144254.s004.pdf]
